# Supplementary material
Source: Springer Nature journal article supplement (https://www.springermedizin.de/resource/supplementary/13054_2011_475_MOESM2_ESM.pdf/9708520)
Supplement: MOESM2 [file 9708520]

1429 critically ill patients  
without any neurological injury and derangement

4 patients were excluded  
(body temperature was not adequately collected)

1425 patients were eligible for study

606 patients with sepsis  
at admission of ICU

819 patients without sepsis  
at admission of ICU
